# Supplementary material for: Pathogenic Biofilm Removal Potential of Wild-Type Lacticaseibacillus rhamnosus Strains
Source: MDPI journal article supplement (doi:10.3390/pathogens12121449), 2023-12-14
Supplement: s1 [file s1]

## Supplementary material

**Table S1.** OD values (540 nm) of positive controls before treatment with *Lacticaseibacillus rhamnosus* strains CFSs.

| Microbial species              | <i>L. rhamnosus</i> strains |             |             |             |             |             |
|--------------------------------|-----------------------------|-------------|-------------|-------------|-------------|-------------|
|                                | GG                          | OLXAL-1     | OLXAL-2     | OLXAL-3     | OLXAL-4     | CHTH-2      |
| <b>Non-neutralized CFSs</b>    |                             |             |             |             |             |             |
| <b>S. Enteritidis</b>          | 1.410±0.003                 | 1.400±0.003 | 1.401±0.003 | 1.400±0.003 | 1.403±0.003 | 1.411±0.003 |
| <b>S. Typhimurium</b>          | 1.390±0.003                 | 1.401±0.003 | 1.411±0.003 | 1.399±0.003 | 1.401±0.003 | 1.400±0.003 |
| <b><i>E. coli</i></b>          | 1.423±0.003                 | 1.422±0.003 | 1.419±0.003 | 1.420±0.003 | 1.421±0.003 | 1.422±0.003 |
| <b><i>L. monocytogenes</i></b> | 1.415±0.003                 | 1.416±0.003 | 1.417±0.003 | 1.413±0.003 | 1.418±0.003 | 1.411±0.003 |
| <b><i>S. aureus</i></b>        | 1.435±0.003                 | 1.432±0.003 | 1.430±0.003 | 1.432±0.003 | 1.433±0.003 | 1.431±0.003 |
| <b>Neutralized CFSs</b>        |                             |             |             |             |             |             |
| <b>S. Enteritidis</b>          | 1.403±0.003                 | 1.401±0.003 | 1.410±0.003 | 1.402±0.003 | 1.411±0.003 | 1.401±0.003 |
| <b>S. Typhimurium</b>          | 1.399±0.003                 | 1.400±0.003 | 1.409±0.003 | 1.403±0.003 | 1.400±0.003 | 1.401±0.003 |
| <b><i>E. coli</i></b>          | 1.422±0.003                 | 1.420±0.003 | 1.421±0.003 | 1.421±0.003 | 1.422±0.003 | 1.423±0.003 |
| <b><i>L. monocytogenes</i></b> | 1.416±0.003                 | 1.418±0.003 | 1.416±0.003 | 1.417±0.003 | 1.416±0.003 | 1.417±0.003 |
| <b><i>S. aureus</i></b>        | 1.434±0.003                 | 1.434±0.003 | 1.432±0.003 | 1.430±0.003 | 1.430±0.003 | 1.432±0.003 |
